# Supplementary material
Source: PubMed Central journal article supplement (PMC1904402)
Supplement: ppat.0030081.st001.pdf [file ppat.0030081.st001.pdf]

**Table S1: Oligonucleotides used in this study**

| <b>Primers</b>                                                 | <b>Sequence</b>                             |
|----------------------------------------------------------------|---------------------------------------------|
| Primers used for checking the O139 specific region*            |                                             |
| PCR1A                                                          | 5'-TTGCTGCCAATCATGCCAGCGCCGCC-3'            |
| PCR1B                                                          | 5'-CCATGTTTGCCGGTGTGGGCAGTGAGC-3'           |
| PCR2A                                                          | 5'-GCTCACTGCCACACCGGCAAACATGG-3'            |
| PCR2B                                                          | 5'-GGCTAAGTGTCCGTAAGATATATCCTTGGG-3'        |
| PCR3A                                                          | 5'-CCCAAGGATATATCTTACGGACACTTAGCC-3'        |
| PCR3B                                                          | 5'-CGTCTTGACCAGTTACACCAGTGATAAGGG-3'        |
| PCR4A                                                          | 5'-CCCTTATCACTGGTGTAAGTGGTCAAGACG-3'        |
| PCR4B                                                          | 5'-CCTGCTCCTCGCTCAACATTCGGTAATTAATCG-3'     |
| PCR5A                                                          | 5'-CGATTAATTACCGAAATGTTGAGCGAGGAGCAGG-3'    |
| PCR5B                                                          | 5'-TATAGAGGAATAACAACACTGAGATATCAAGCG-3'     |
| PCR6A                                                          | 5'-AATGACGCTTGATATCTCAGTTGTTATTCC-3'        |
| PCR6B                                                          | 5'-CGGCTACCAACACCACCAGACAACACAACAGGGC-3'    |
| PCR7A                                                          | 5'-GCCCTGTTGTGTTGTCTGGTGGTGTGGTAGCCG-3'     |
| PCR7B                                                          | 5'-GCAAGCCCAAAAAGGCCGCGAGAAAATCAATTAAGCG-3' |
| PCR8A                                                          | 5'-GCTTAATTGATTTTCTCGCGGCCTTTTGGGCTTGC-3'   |
| PCR8B                                                          | 5'-CCTCGGTAAGTACACGCTCACTCTGCTTGGG-3'       |
| Primers used for checking the O37 specific region <sup>#</sup> |                                             |
| O37-1A                                                         | 5'-TTGCTGCCAATCATGCCAGCGCCGCC-3'            |
| O37-1B                                                         | 5'-CTTCGCCAACTCAATTGGGTGTGATGC-3'           |
| O37-2A                                                         | 5'-CACCCAATTGAGTTGGCGAAGTCACC-3'            |
| O37-2B                                                         | 5'-TGAAAAGCCCACGGTCTAAGGCTCC-3'             |
| O37-3A                                                         | 5'-CCTTAGAACCGTGGGCTTTTCAGTCG-3'            |
| O37-3B                                                         | 5'-ATTAATGAGTTCAATTAAGTCATTCCC-3'           |
| O37-4A                                                         | 5'-GACTTAATTGAACTCATTAATAACTCG-3'           |
| O37-4B                                                         | 5'-CTATGTTCTACAGCCACTTGTTAGC-3'             |
| O37-5A                                                         | 5'-ACTTTAACTCTTGCTAACAAGTGGGC-3'            |
| O37-5B                                                         | 5'-ACTCCCGCGATAGCTGTTACTGCAGG-3'            |
| O37-6A                                                         | 5'-ACTCCTGCAGTAACAGCTATCGCGGG-3'            |

|                                                                   |                                                             |
|-------------------------------------------------------------------|-------------------------------------------------------------|
| O37-6B                                                            | 5'-ATGACTTCTTCTTAGTTTTGAATCC-3'                             |
| O37-7A                                                            | 5'-TCAAAACTAAGAAGAAGTCATTTGC-3'                             |
| O37-7B                                                            | 5'-TTCCCTCCGTGATGAACCACTTCC-3'                              |
| Primers for the construction of strain VCO139-Kan                 |                                                             |
| 1-wbfB-up-NcoI                                                    | 5'-GCGCCATGGTGACCCAAGCTCAGCCTTTGGC-3'                       |
| 2-wbfB-end-OL-Kan                                                 | 5'-GTAAGCAGACAGTATATTGCTATGCA<br>AAAAATGATCCTAAAGTG-3'      |
| 3-kanR-up-OL-wbfB                                                 | 5'-CATAGCAATATACTGTCTGCTTA<br>CATAAACAGTAATAACAAGG-3'       |
| 4-kanR-down-OL-wbfA                                               | 5'-GCCAAGTTGAGTCCGCTCATGAATT<br>AATTCTTAGAAAACTCATCG-3'     |
| 5-wbfA-start-OL-Kan                                               | 5'-ATTCATGAGCGGACTCAACTTG<br>GCAAACCTCAGGGACTTTACATCATGC-3' |
| 6-wbfA-down-SacI                                                  | 5'-CGCGAGCTCACTTGTTTGCGGGTTGCTATTATTGCCG-3'                 |
| Primers for the construction of strain VCO139-Kan $\Delta$ IS1358 |                                                             |
| 1-IS1358-KO-SacI                                                  | 5'-CGCGAGCTCGATGCAAGAAGCGTATAAAAGTGTTTAGC-3'                |
| 2-IS1358-KO                                                       | 5'-TGAACATTACCGTCATGC<br>GGTTTCCCTGACATCGGCATGTTTCATG-3'    |
| 3-IS1358-KO                                                       | 5'-GGAAACCGCATGACGGTAAT<br>GTTTCATGCGGTTTCCGTGACGTGACGG-3'  |
| 4-IS1358-KO-NcoI                                                  | 5'-GCGCCATGGCATCCACATCCGCTGTGTATTTCAGGAG-3'                 |
| Primers for the construction of strain O37-Kan                    |                                                             |
| 1-ORF6-up-XbaI                                                    | 5'-GCGTCTAGATAAGCGAGGGTATAAACTTCATATCC-3'                   |
| 2-ORF6-end-OL-Kan                                                 | 5'-GTAAGCAGACAGTTCATGCAG<br>CAGAGCATTATAAATTAATACTATAAC-3'  |
| 3-kanR-up-OL-ORF6                                                 | 5'-CTGCTGCATGAACTGTCTGCTTACAT<br>AAACAGTAATAACAAGG-3'       |
| 4-kanR-down-OL-ORF7                                               | 5'-TACTGCTTACATTCCGCTCATGAATTAAT<br>TCTTAGAAAACTCATCG-3'    |
| 5-ORF7-start-OL-                                                  | 5'-ATTCATGAGCGGAATGTAAGCAGT                                 |

|                         |                                          |
|-------------------------|------------------------------------------|
| <u>Kan</u>              | ATTAGATACAAAGAGTTTGG-3'                  |
| <u>6-ORF7-down-SacI</u> | 5'-CGCGAGCTCGTTTTAGTGTGCTCAAGATTTTCGG-3' |

\* Primer PCR1A – 8B correspond to Fig. 1; from left to right

# Primer O37-1A – 7B were designed based on the O37 sequence of Li *et al.* [7]

## Supporting references:

1. Waldor MK, Mekalanos JJ (1994) *Vibrio cholerae* O139 specific gene sequences. *Lancet* 343: 1366.
2. Waldor MK, Mekalanos JJ (1994) ToxR regulates virulence gene expression in non-O1 strains of *Vibrio cholerae* that cause epidemic cholera. *Infect Immun* 62: 72-78.
3. Meibom KL, Li XB, Nielsen AT, Wu CY, Roseman S, et al. (2004) The *Vibrio cholerae* chitin utilization program. *Proc Natl Acad Sci USA* 101: 2524-2529.
4. Fullner KJ, Mekalanos JJ (1999) Genetic characterization of a new type IV-A pilus gene cluster found in both classical and El Tor biotypes of *Vibrio cholerae*. *Infect Immun* 67: 1393-1404.
5. Aldova E, Laznickova K, Stepankova E, Lietava J (1968) Isolation of nonagglutinable vibrios from an enteritis outbreak in Czechoslovakia. *J Infect Dis* 118: 25-31.
6. Felsenfeld O, Stegherr-Barrios A, Aldova E, Holmes J, Parrott MW (1970) In vitro and in vivo studies of streptomycin-dependent cholera vibrios. *Appl Microbiol* 19: 463-469.
7. Li M, Shimada T, Morris JG, Jr., Sulakvelidze A, Sozhamannan S (2002) Evidence for the emergence of non-O1 and non-O139 *Vibrio cholerae* strains with pathogenic potential by exchange of O-antigen biosynthesis regions. *Infect Immun* 70: 2441-2453.
8. Meibom KL, Blokesch M, Dolganov NA, Wu C-Y, Schoolnik GK (2005) Chitin induces natural competence in *Vibrio cholerae*. *Science* 310: 1824-1827.
9. Zhu J, Miller MB, Vance RE, Dziejman M, Bassler BL, et al. (2002) Quorum-sensing regulators control virulence gene expression in *Vibrio cholerae*. *Proc Natl Acad Sci USA* 99: 3129-3134.
10. Joelsson A, Liu Z, Zhu J (2006) Genetic and phenotypic diversity of quorum-sensing systems in clinical and environmental isolates of *Vibrio cholerae*. *Infect Immun* 74: 1141-1147.
11. Heidelberg JF, Eisen JA, Nelson WC, Clayton RA, Gwinn ML, et al. (2000) DNA sequence of both chromosomes of the cholera pathogen *Vibrio cholerae*. *Nature* 406: 477-483.
12. Mazel D, Dychinco B, Webb VA, Davies J (1998) A distinctive class of integron in the *Vibrio cholerae* genome. *Science* 280: 605-608.
13. Jermyn WS, Boyd EF (2002) Characterization of a novel *Vibrio* pathogenicity island (VPI-2) encoding neuraminidase (nanH) among toxigenic *Vibrio cholerae* isolates. *Microbiology* 148: 3681-3693.
14. Dziejman M, Balon E, Boyd D, Fraser CM, Heidelberg JF, et al. (2002) Comparative genomic analysis of *Vibrio cholerae*: genes that correlate with cholera endemic and pandemic disease. *Proc Natl Acad Sci USA* 99: 1556-1561.
15. Beaber JW, Hochhut B, Waldor MK (2002) Genomic and functional analyses of SXT, an integrating antibiotic resistance gene transfer element derived from *Vibrio cholerae*. *J Bacteriol* 184: 4259-4269.
