# Supplementary material
Source: PubMed Central journal article supplement (PMC1904402)
Supplement: ppat.0030081.st002.pdf [file ppat.0030081.st002.pdf]

**Table S2: List of microarrays and corresponding GEO accession numbers.**

| <b>GEO Samples accession number</b>                        | <b>Cy3 labelled</b> | <b>Cy5 labelled</b> | <b>Description</b>                 | <b>GEO Series accession number*</b> |
|------------------------------------------------------------|---------------------|---------------------|------------------------------------|-------------------------------------|
| O1 → O139 Serogroup conversion / Kan <sup>R</sup> selected |                     |                     |                                    |                                     |
| GSM115549                                                  | A1552               | VCO139              | CA1108 - DNA; A1552 vs. VCO139-Kan | GSE5120                             |
| GSM115571                                                  | A1552               | VCO139              | CA1109 - DNA; A1552 vs. VCO139-Kan | GSE5120                             |
| GSM115560                                                  | A1552               | VCO139              | CA1122 - DNA; A1552 vs. VCO139-Kan | GSE5120                             |
| GSM115562                                                  | A1552               | VCO139              | CA1123 - DNA; A1552 vs. VCO139-Kan | GSE5120                             |
| GSM115587                                                  | A1552               | VCO139              | CA1067 - DNA; A1552 vs. VCO139-Kan | GSE5120                             |
| GSM115589                                                  | A1552               | VCO139              | CA1068 - DNA; A1552 vs. VCO139-Kan | GSE5120                             |
| GSM115573                                                  | A1552               | ASGC#1              | CA1110 - DNA; A1552 vs. ASGC#1     | GSE5120                             |
| GSM115575                                                  | A1552               | ASGC#1              | CA1111 - DNA; A1552 vs. ASGC#1     | GSE5120                             |
| GSM115577                                                  | A1552               | ASGC#2              | CA1112 - DNA; A1552 vs. ASGC#2     | GSE5120                             |
| GSM115579                                                  | A1552               | ASGC#2              | CA1113 - DNA; A1552 vs. ASGC#2     | GSE5120                             |
| GSM115582                                                  | A1552               | ASGC#3              | CA1114 - DNA; A1552 vs. ASGC#3     | GSE5120                             |
| GSM115585                                                  | A1552               | ASGC#3              | CA1115 - DNA; A1552 vs. ASGC#3     | GSE5120                             |
| GSM115564                                                  | A1552               | AIISGC#1            | CA1124 - DNA; A1552 vs. AIISGC#1   | GSE5120                             |
| GSM115566                                                  | A1552               | AIISGC#1            | CA1125 - DNA; A1552 vs. AIISGC#1   | GSE5120                             |
| GSM115572                                                  | A1552               | AIISGC#2            | CA1126 - DNA; A1552 vs. AIISGC#2   | GSE5120                             |
| GSM115574                                                  | A1552               | AIISGC#2            | CA1127 - DNA; A1552 vs. AIISGC#2   | GSE5120                             |
| GSM115576                                                  | A1552               | AIISGC#3            | CA1128 - DNA; A1552 vs. AIISGC#3   | GSE5120                             |
| GSM115578                                                  | A1552               | AIISGC#3            | CA1129 - DNA; A1552 vs. AIISGC#3   | GSE5120                             |
| GSM115555                                                  | A1552               | AIISGC#1            | CA1136 - DNA; A1552 vs. AIISGC#1   | GSE5120                             |

|                                                 |       |            |                                  |         |
|-------------------------------------------------|-------|------------|----------------------------------|---------|
| GSM115557                                       | A1552 | AIISGC#1   | CA1137 - DNA; A1552 vs. AIISGC#1 | GSE5120 |
| GSM115559                                       | A1552 | AIISGC#2   | CA1057- DNA; A1552 vs. AIISGC#2  | GSE5120 |
| GSM115561                                       | A1552 | AIISGC#2   | CA1058 - DNA; A1552 vs. AIISGC#2 | GSE5120 |
| GSM115563                                       | A1552 | AIISGC#3   | CA1059 - DNA; A1552 vs. AIISGC#3 | GSE5120 |
| GSM115565                                       | A1552 | AIISGC#3   | CA1060 - DNA; A1552 vs. AIISGC#3 | GSE5120 |
| O1 → O139 serogroup conversion / mixed biofilms |       |            |                                  |         |
| GSM138055                                       | A1552 | A1552SGC-A | CB093-A1552 vs. A1552SGC-A       | GSE5932 |
| GSM138056                                       | A1552 | A1552SGC-A | CB094-A1552 vs. A1552SGC-A       | GSE5932 |
| GSM138057                                       | A1552 | A1552SGC-B | CB095-A1552 vs. A1552SGC-B       | GSE5932 |
| GSM138058                                       | A1552 | A1552SGC-B | CB096-A1552 vs. A1552SGC-B       | GSE5932 |
| GSM138059                                       | A1552 | A1552SGC-C | CB097-A1552 vs. A1552SGC-C       | GSE5932 |
| GSM138060                                       | A1552 | A1552SGC-C | CB098-A1552 vs. A1552SGC-C       | GSE5932 |
| GSM138068                                       | A1552 | MCISGC#1   | CA1093-A1552 vs. MCISGC#1        | GSE5932 |
| GSM138069                                       | A1552 | MCISGC#1   | CA1095-A1552 vs. MCISGC#1        | GSE5932 |
| GSM138070                                       | A1552 | MCIISGC#1  | CB057-A1552 vs. MCIISGC#1        | GSE5932 |
| GSM138063                                       | A1552 | MCIISGC#1  | CB058-A1552 vs. MCIISGC#1        | GSE5932 |
| GSM138066                                       | A1552 | MCIISGC#2  | CA1075-A1552 vs. MCIISGC#2       | GSE5932 |
| GSM138067                                       | A1552 | MCIISGC#2  | CA1076-A1552 vs. MCIISGC#2       | GSE5932 |
| GSM138064                                       | A1552 | MCIISGC#1  | CB059-A1552 vs. MCIISGC#1        | GSE5932 |
| GSM138065                                       | A1552 | MCIISGC#1  | CB060-A1552 vs. MCIISGC#1        | GSE5932 |
| GSM138061                                       | A1552 | MCIISGC#2  | CB501-A1552 vs. MCIISGC#2        | GSE5932 |
| GSM138062                                       | A1552 | MCIISGC#2  | CB502-A1552 vs. MCIISGC#2        | GSE5932 |
| O1 → O37 serogroup conversion / phage selected  |       |            |                                  |         |
| GSM138090                                       | A1552 | ATCC25872  | CB503-DNA-A1552 vs. ATCC25872    | GSE5934 |
| GSM138092                                       | A1552 | ATCC25872  | CB504-DNA-A1552 vs. ATCC25872    | GSE5934 |
| GSM138096                                       | A1552 | ATCC25872  | CB509-DNA-A1552 vs. ATCC25872    | GSE5934 |
| GSM138094                                       | A1552 | AIpO37#1   | CB515- DNA; A1552 vs. AIpO37#1   | GSE5934 |
| GSM138095                                       | A1552 | AIpO37#1   | CB516- DNA; A1552 vs. AIpO37#1   | GSE5934 |
| GSM138097                                       | A1552 | AIpO37#4   | CB517- DNA; A1552 vs. AIpO37#4   | GSE5934 |
| GSM138099                                       | A1552 | AIpO37#4   | CB518- DNA; A1552 vs. AIpO37#4   | GSE5934 |
| GSM138101                                       | A1552 | AIpO37#6   | CB519- DNA; A1552 vs. AIpO37#6   | GSE5934 |
| GSM138103                                       | A1552 | AIpO37#6   | CB520- DNA; A1552 vs. AIpO37#6   | GSE5934 |

|                                                 |       |             |                                      |         |
|-------------------------------------------------|-------|-------------|--------------------------------------|---------|
|                                                 |       |             | AIpO37#6                             |         |
| GSM138105                                       | A1552 | AIpO37#8    | CB521- DNA; A1552 vs.<br>AIpO37#8    | GSE5934 |
| GSM138093                                       | A1552 | AIpO37#8    | CB522- DNA; A1552 vs.<br>AIpO37#8    | GSE5934 |
| GSM138107                                       | A1552 | AIIpO37#9   | CB499- DNA; A1552 vs.<br>AIIpO37#9   | GSE5934 |
| GSM138109                                       | A1552 | AIIpO37#9   | CB500- DNA; A1552 vs.<br>AIIpO37#9   | GSE5934 |
| GSM138112                                       | A1552 | AIIpO37#13  | CB531- DNA; A1552 vs.<br>AIIpO37#13  | GSE5934 |
| GSM138098                                       | A1552 | AIIpO37#13  | CB532- DNA; A1552 vs.<br>AIIpO37#13  | GSE5934 |
| GSM138102                                       | A1552 | AIIpO37#16  | CB534- DNA; A1552 vs.<br>AIIpO37#16  | GSE5934 |
| GSM138100                                       | A1552 | AIIpO37#16  | CB533- DNA; A1552 vs.<br>AIIpO37#16  | GSE5934 |
| GSM138104                                       | A1552 | AIIPpO37#9A | CB535- DNA; A1552 vs.<br>AIIPpO37#9A | GSE5934 |
| GSM138106                                       | A1552 | AIIPpO37#9A | CB536- DNA; A1552 vs.<br>AIIPpO37#9A | GSE5934 |
| GSM138111                                       | A1552 | AIVpO37#1A  | CB524- DNA; A1552 vs.<br>AIVpO37#1A  | GSE5934 |
| GSM138113                                       | A1552 | AIVpO37#1A  | CB525- DNA; A1552 vs.<br>AIVpO37#1A  | GSE5934 |
| GSM138114                                       | A1552 | AIVpO37#3A  | CB526- DNA; A1552 vs.<br>AIVpO37#3A  | GSE5934 |
| GSM138115                                       | A1552 | AIVpO37#3A  | CB527- DNA; A1552 vs.<br>AIVpO37#3A  | GSE5934 |
| GSM138087                                       | A1552 | AIVpO37#4A  | CB528- DNA; A1552 vs.<br>AIVpO37#4A  | GSE5934 |
| GSM138088                                       | A1552 | AIVpO37#4A  | CB529- DNA; A1552 vs.<br>AIVpO37#4A  | GSE5934 |
| GSM138089                                       | A1552 | AIVpO37#8A  | CB530- DNA; A1552 vs.<br>AIVpO37#8A  | GSE5934 |
| GSM138091                                       | A1552 | AIVpO37#8A  | CB270- DNA; A1552 vs.<br>AIVpO37#8A  | GSE5934 |
| O1 → O139 serogroup conversion / phage selected |       |             |                                      |         |
| GSM120146                                       | A1552 | MO10        | CB479- DNA; A1552 vs. MO10           | GSE5302 |
| GSM120148                                       | A1552 | MO10        | CB480- DNA; A1552 vs. MO10           | GSE5302 |
| GSM120157                                       | A1552 | ApO139#2    | CB451- DNA; A1552 vs.<br>ApO139#2    | GSE5302 |
| GSM120159                                       | A1552 | ApO139#2    | CB452- DNA; A1552 vs.<br>ApO139#2    | GSE5302 |
| GSM120163                                       | A1552 | ApO139#4    | CB456- DNA; A1552 vs.                | GSE5302 |

|           |       |             |                                                     |         |
|-----------|-------|-------------|-----------------------------------------------------|---------|
| GSM120164 | A1552 | ApO139#4    | ApO139#4<br>CB457- DNA; A1552 vs.<br>ApO139#4       | GSE5302 |
| GSM120156 | A1552 | ApO139#6    | ApO139#6<br>CB459- DNA; A1552 vs.<br>ApO139#6       | GSE5302 |
| GSM120165 | A1552 | ApO139#6    | ApO139#6<br>CB458- DNA; A1552 vs.<br>ApO139#6       | GSE5302 |
| GSM120158 | A1552 | ApO139#8    | ApO139#8<br>CB461- DNA; A1552 vs.<br>ApO139#8       | GSE5302 |
| GSM120160 | A1552 | ApO139#8    | ApO139#8<br>CB462- DNA; A1552 vs.<br>ApO139#8       | GSE5302 |
| GSM120161 | A1552 | MO10        | CB454- DNA; A1552 vs. MO10                          | GSE5302 |
| GSM120162 | A1552 | MO10        | CB455- DNA; A1552 vs. MO10                          | GSE5302 |
| GSM120147 | A1552 | AllpO139#3  | AllpO139#3<br>CB471- DNA; A1552 vs.<br>AllpO139#3   | GSE5302 |
| GSM120149 | A1552 | AllpO139#3  | AllpO139#3<br>CB472- DNA; A1552 vs.<br>AllpO139#3   | GSE5302 |
| GSM120150 | A1552 | AllpO139#4  | AllpO139#4<br>CB473- DNA; A1552 vs.<br>AllpO139#4   | GSE5302 |
| GSM120151 | A1552 | AllpO139#4  | AllpO139#4<br>CB474- DNA; A1552 vs.<br>AllpO139#4   | GSE5302 |
| GSM120152 | A1552 | AllpO139#5  | AllpO139#5<br>CB475- DNA; A1552 vs.<br>AllpO139#5   | GSE5302 |
| GSM120153 | A1552 | AllpO139#5  | AllpO139#5<br>CB476- DNA; A1552 vs.<br>AllpO139#5   | GSE5302 |
| GSM120154 | A1552 | AllpO139#6  | AllpO139#6<br>CB477- DNA; A1552 vs.<br>AllpO139#6   | GSE5302 |
| GSM120155 | A1552 | AllpO139#6  | AllpO139#6<br>CB478- DNA; A1552 vs.<br>AllpO139#6   | GSE5302 |
| GSM138086 | A1552 | AllIpO139#1 | AllIpO139#1<br>CB481- DNA; A1552 vs.<br>AllIpO139#1 | GSE5302 |
| GSM138076 | A1552 | AllIpO139#1 | AllIpO139#1<br>CB482- DNA; A1552 vs.<br>AllIpO139#1 | GSE5302 |
| GSM138078 | A1552 | AllIpO139#3 | AllIpO139#3<br>CB483- DNA; A1552 vs.<br>AllIpO139#3 | GSE5302 |
| GSM138080 | A1552 | AllIpO139#3 | AllIpO139#3<br>CB484- DNA; A1552 vs.<br>AllIpO139#3 | GSE5302 |
| GSM138082 | A1552 | AllIpO139#4 | AllIpO139#4<br>CB485- DNA; A1552 vs.<br>AllIpO139#4 | GSE5302 |
| GSM138083 | A1552 | AllIpO139#4 | AllIpO139#4<br>CB486- DNA; A1552 vs.<br>AllIpO139#4 | GSE5302 |
| GSM138084 | A1552 | AllIpO139#5 | AllIpO139#5<br>CB487- DNA; A1552 vs.<br>AllIpO139#5 | GSE5302 |
| GSM138085 | A1552 | AllIpO139#5 | AllIpO139#5<br>CB488- DNA; A1552 vs.<br>AllIpO139#5 | GSE5302 |
| GSM138073 | A1552 | AIVpO139#2  | CB489- DNA; A1552 vs.                               | GSE5302 |

|           |       |            |                                                   |         |
|-----------|-------|------------|---------------------------------------------------|---------|
| GSM138074 | A1552 | AIVpO139#2 | AIVpO139#2<br>CB490- DNA; A1552 vs.<br>AIVpO139#2 | GSE5302 |
| GSM138071 | A1552 | AIVpO139#4 | CB450- DNA; A1552 vs.<br>AIVpO139#4               | GSE5302 |
| GSM138072 | A1552 | AIVpO139#4 | CB460- DNA; A1552 vs.<br>AIVpO139#4               | GSE5302 |
| GSM138075 | A1552 | AIVpO139#5 | CB492- DNA; A1552 vs.<br>AIVpO139#5               | GSE5302 |
| GSM138077 | A1552 | AIVpO139#5 | CB493- DNA; A1552 vs.<br>AIVpO139#5               | GSE5302 |
| GSM138079 | A1552 | AIVpO139#8 | CB494- DNA; A1552 vs.<br>AIVpO139#8               | GSE5302 |
| GSM138081 | A1552 | AIVpO139#8 | CB495- DNA; A1552 vs.<br>AIVpO139#8               | GSE5302 |

\* The microarray data have been deposited in the NIH National Center for Biotechnology Information's Gene Expression Omnibus (GEO, [www.ncbi.nlm.nih.gov/geo/](http://www.ncbi.nlm.nih.gov/geo/)).
