# Supplementary material
Source: PubMed Central journal article supplement (PMC1904402)

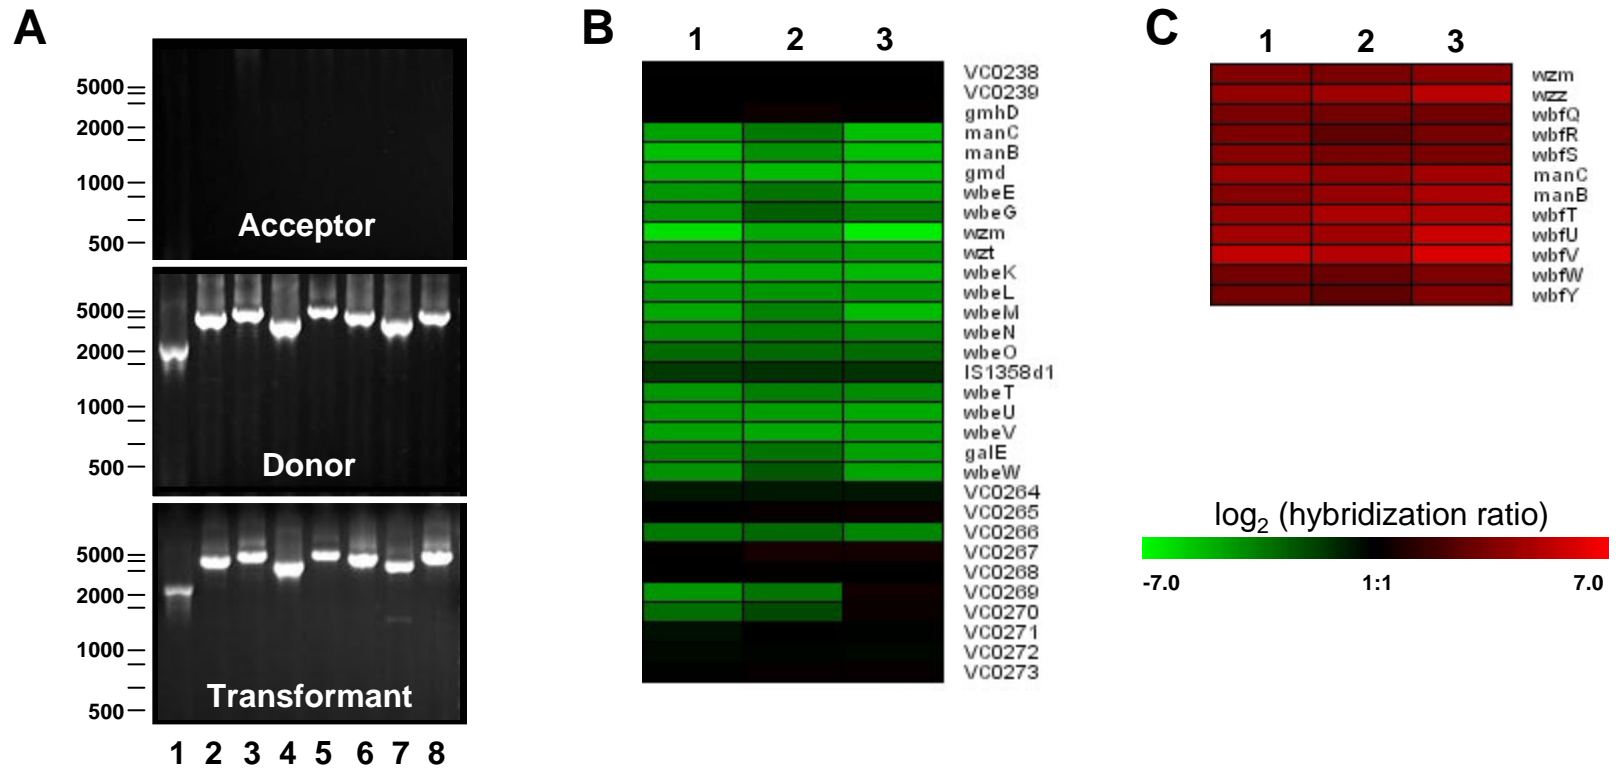

Fig. S1

Supplement: ppat.0030081.sg001.pdf [file ppat.0030081.sg001.pdf]

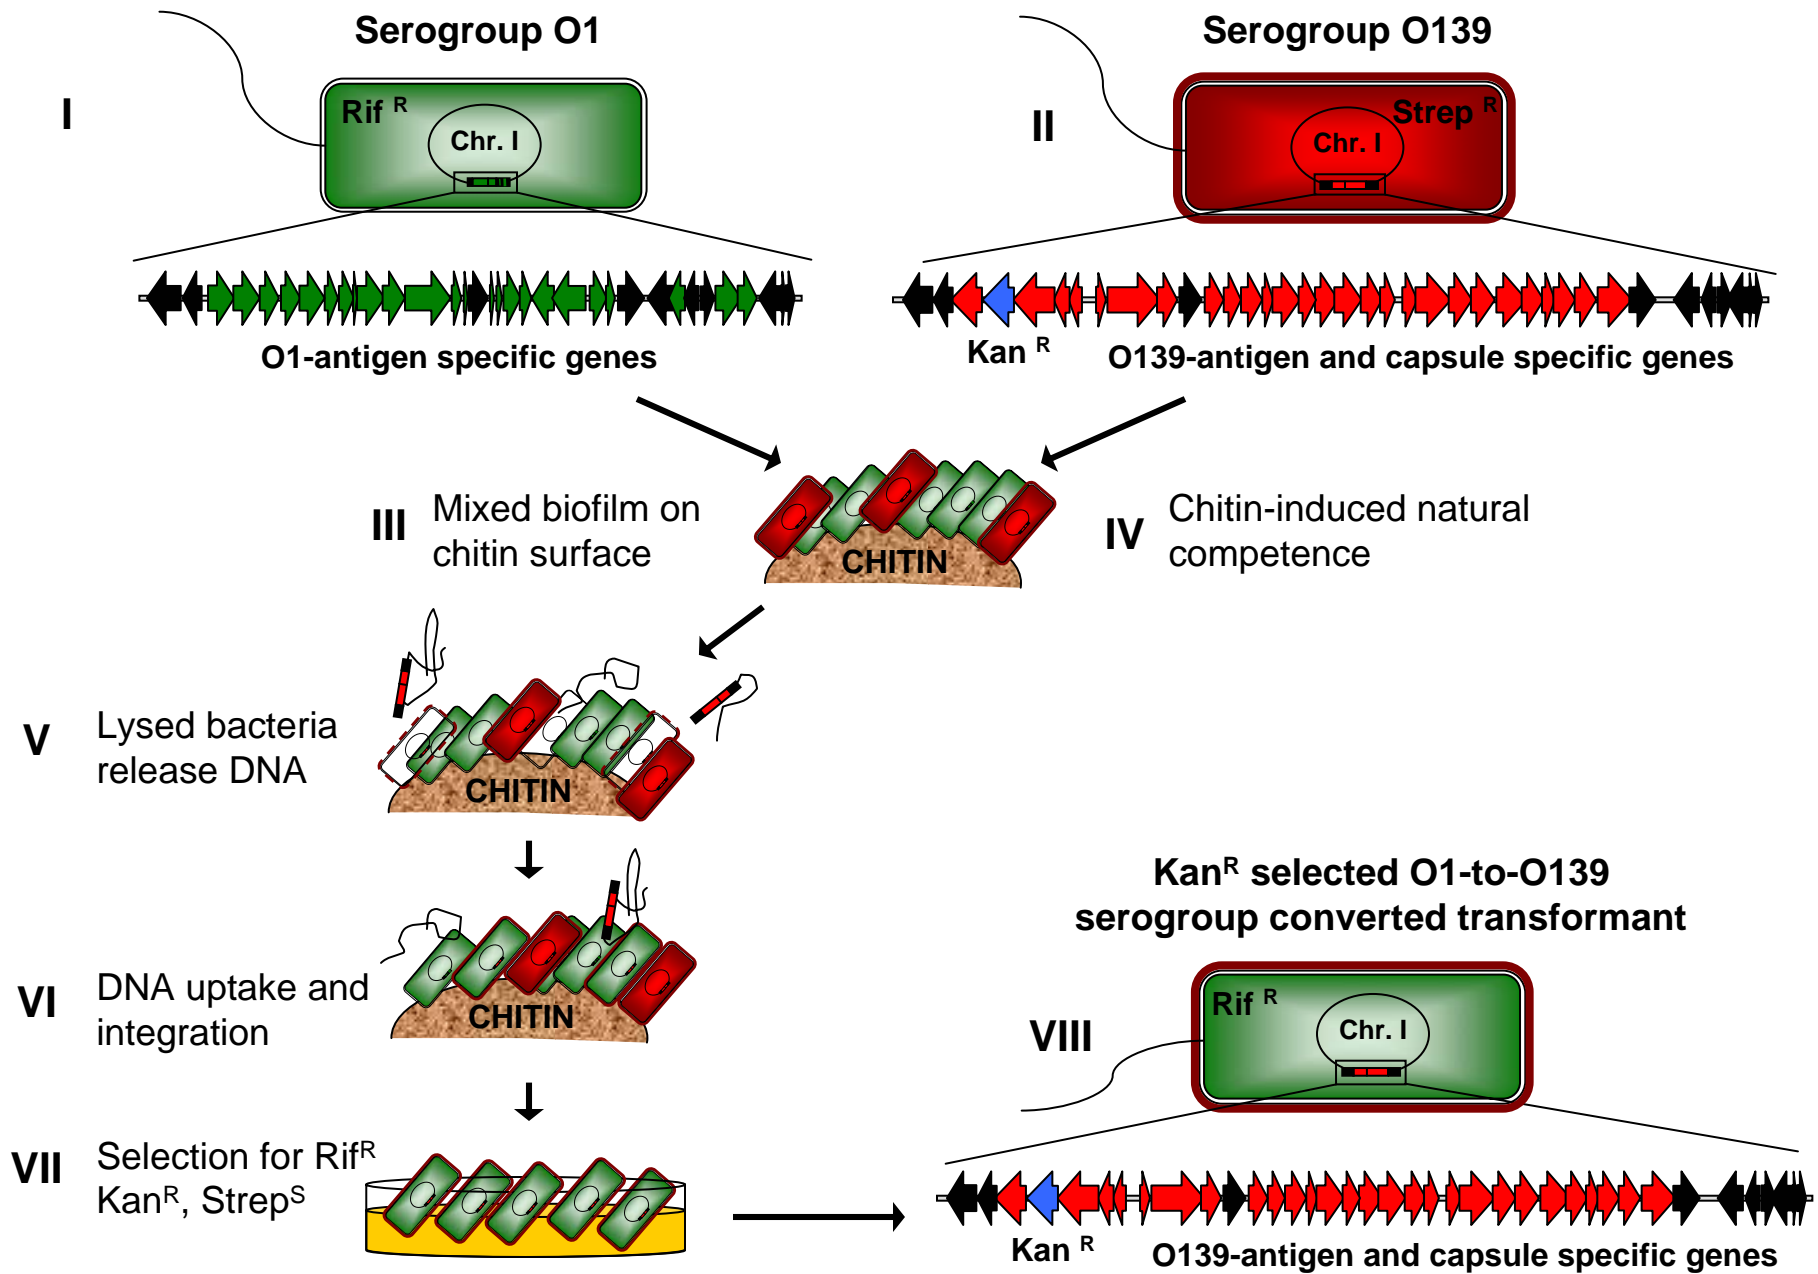

**Fig. S2**

Supplement: ppat.0030081.sg002.pdf [file ppat.0030081.sg002.pdf]

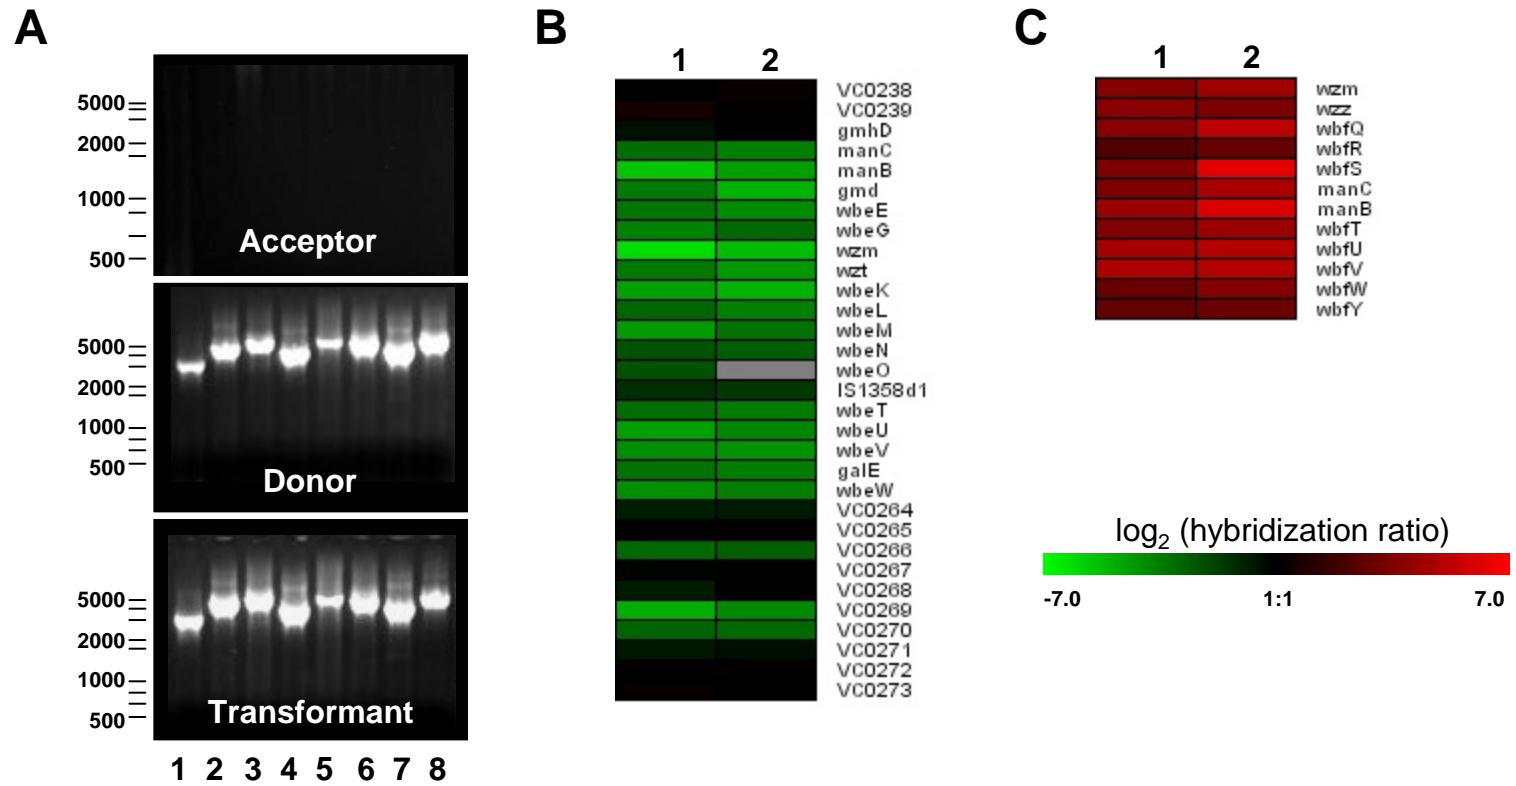

Fig. S3

Supplement: ppat.0030081.sg003.pdf [file ppat.0030081.sg003.pdf]

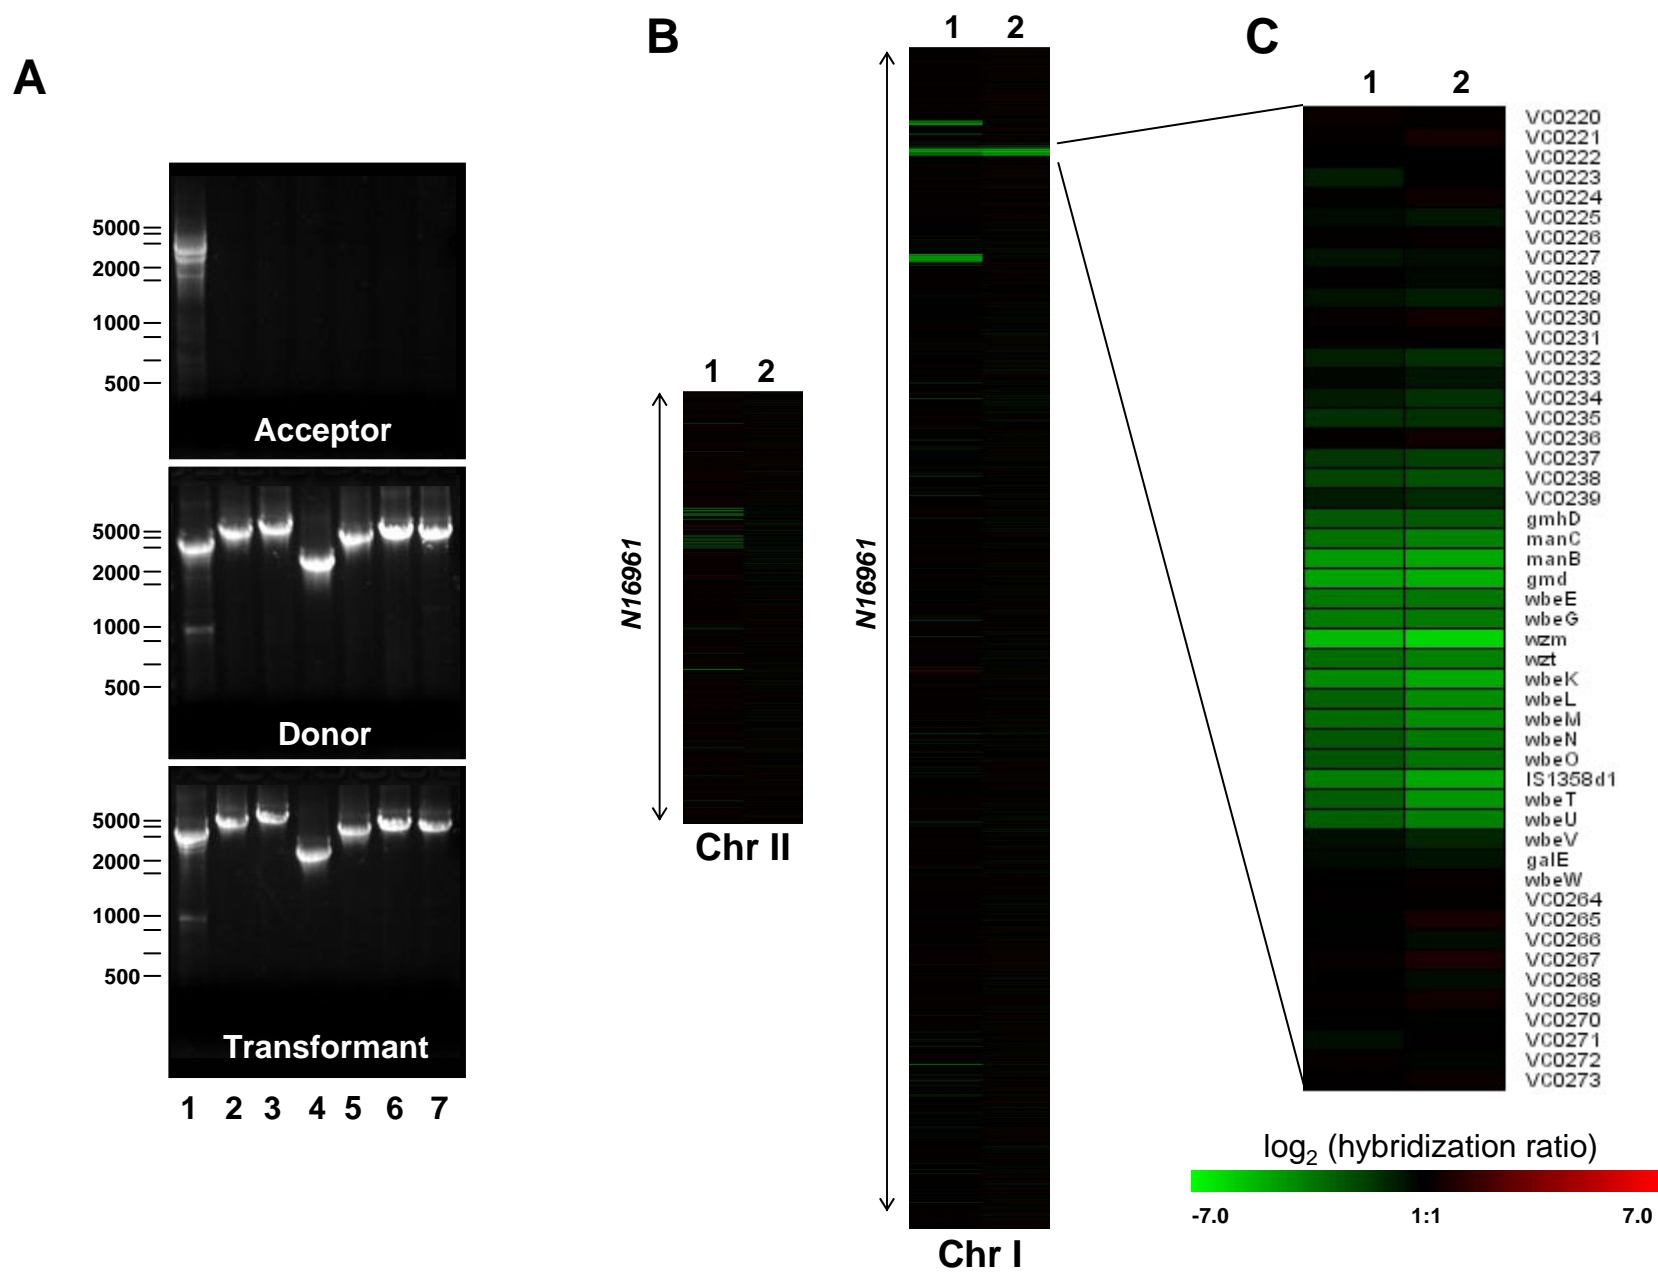

Fig. S4

Supplement: ppat.0030081.sg004.pdf [file ppat.0030081.sg004.pdf]

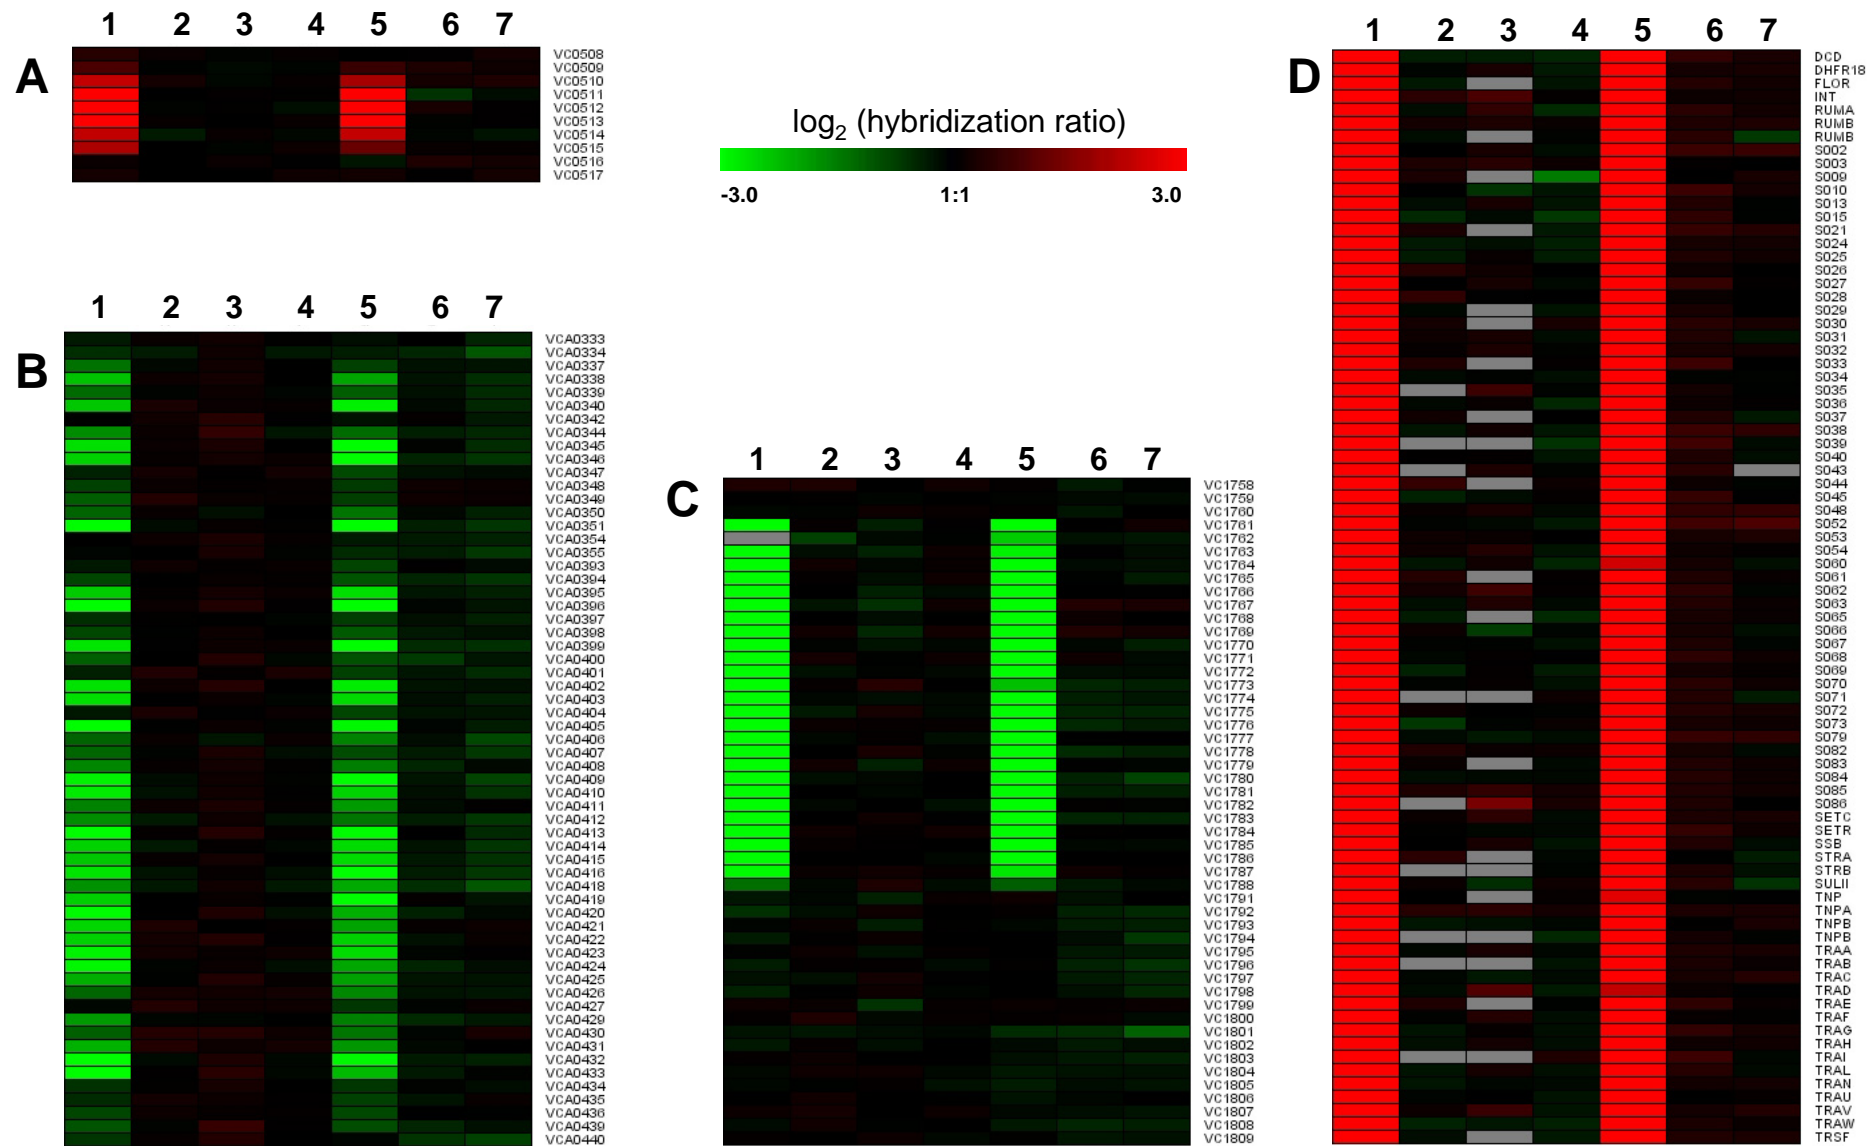

Fig. S5

Supplement: ppat.0030081.sg005.pdf [file ppat.0030081.sg005.pdf]
